# Supplementary material for: Tunable Silver-Functionalized Porous Frameworks for Antibacterial Applications
Source: Antibiotics (Basel). 2018 Jul 3;7(3):55. doi: 10.3390/antibiotics7030055 (PMC6165165; doi:10.3390/antibiotics7030055)
Supplement: Supplementary file 1 [file antibiotics-07-00055-s001.docx]

Electronic supporting information

Tunable Ag functionalised porous frameworks for antibacterial applications

Mark A. Isaacs 1, Brunella Barbero2, Lee J. Durndell 3, Anthony C. Hilton 4, Luca Olivi 5, Christopher M. A. Parlett 2, Karen Wilson6 and Adam F. Lee 6.*

1 Department of Chemistry, University College London; mark.isaacs@ucl.ac.uk

2 European Bioenergy Research Institute, Aston University, Birmingham, B4 7ET, UK.

3 Inorganic Chemistry and Catalysis, Debye Institute for Nanomaterials Science, Utrect University. Universiteitsweg 99, 3584 CG Utrect, The Netherlands.

4 Life and Health Sciences, Aston University, Birmingham, B4 7ET, UK.

5 Sincrotrone Trieste, 34149 Basovizza, Trieste, Italy.

6 School of Science, RMIT University, Melbourne, VIC3001, Australia.

***** Correspondence: adam.lee2@rmit.edu.au; Tel.: +61-3-9925-2623

**Figure S1**: (left) N2 adsorption-desorption isotherms, and BJH pore size distributions for parent SBA-15, TiO2/SBA-15 and TiO2/MM-SBA-15. Type-IV isotherms with H1 hysteresis is characteristic of mesoporous SBA-15.

**Figure S2**: XRD patterns for the three prepared support materials, SBA-15, TiO2/SBA-15 and TiO2/MM-SBA-15.

**Table S1**: Elemental analysis of Ag/SBA-15, Ag/ TiO2/SBA-15 and Ag/TiO2/MM-SBA-15.

| **Material and nominal loading** | **Ag loading / wt%** | |
| --- | --- | --- |
| **Bulka** | **Surfaceb** |
| 0.3 wt% Ag/SBA-15 | 0.3 | 0.45 |
| 1 wt% Ag/SBA-15 | 0.95 | 0.55 |
| 2 wt% Ag/SBA-15 | 2.3 | 1.1 |
| 0.3 wt% Ag/TiO2/SBA-15 | 0.3 | 0.55 |
| 1 wt% Ag/TiO2/SBA-15 | 0.9 | 0.65 |
| 2 wt% Ag/TiO2/SBA-15 | 2.3 | 1.4 |
| 0.3 wt% Ag/TiO2/MM-SBA-15 | 0.25 | 0.4 |
| 1 wt% Ag/TiO2/MM-SBA-15 | 0.75 | 0.7 |
| 2 wt% Ag/TiO2/MM-SBA-15 | 1.2 | 1.15 |

aICP-OES, bXPS

**Figure S3**: XRD patterns for (a) Ag/SBA-15, (b) Ag/TiO2/SBA-15, and (c) Ag/TiO2/MM-SBA-15 as a function of silver loading. All reflections associated with fcc silver metal.

**Figure S4**: Particle size distributions from TEM for (a) 0.3 wt%, (b) 0.95 wt% and (c) 2.4 wt% Ag nanoparticles deposited on SBA-15.

**Figure S5**: Particle size distributions from TEM (a) 0.3 wt%, (b) 0.9 wt% and (c) 2.4 wt% Ag nanoparticles deposited on TiO2/SBA-15.

**Figure S6**: Particle size distributions from TEM (a) 0.25 wt%, (b) 0.75 wt% and (c) 1.2 wt% Ag nanoparticles deposited on TiO2/MM-SBA-15.

**Figure S7**: Mean particle size and standard deviation for Ag/SBA-15, Ag/ TiO2/SBA-15, and Ag/TiO2/MM-SBA-15 as a function of bulk silver loading.

**Figure S8**: Fitted Ag 3d XP spectra of (a) Ag/SBA-15, (b) Ag/TiO2/SBA-15, and (c) Ag/TiO2/MM-SBA-15 as a function of Ag loading. All spectra fitted to carbonate and metal spin-orbit doublets possessing common lineshapes and fixed binding energies.

**Figure S9**: XANES profiles for (a) 0.3 wt%, (b) 0.95 wt% and (c) 2.4 wt% Ag/SBA-15.

**Figure S10**: XANES profiles for (a) 0.3 wt%, (b) 0.9 wt% and (c) 2.4 wt% Ag/TiO2/SBA-15.

**Figure S11**: XANES profiles for (a) 0.25 wt%, (b) 0.75 wt% and (c) 1.2 wt% Ag/TiO2/MM-SBA-15.

**Figure S12**: Fitted dissolution kinetics for Ag/SBA-15, Ag/TiO2/SBA-15, and Ag/TiO2/MM-SBA-15 as a function of particle size.

**Figure S13**: Logarithmic reductions for parent SBA-15, Ag/TiO2/SBA-15, and Ag/TiO2/MM-SBA-15 frameworks against (a) *Staphylococcus aureus* and (b) *Pseudomonas aeruginosa* after 24 h incubation.

**Figure S14**: Logarithmic reductions for (a) Ag/SBA-15, (b) Ag/TiO2/SBA-15, and (c) Ag/TiO2/MM-SBA-15 against *Staphylococcus aureus* and *Pseudomonas aeruginosa*.

**Figure S15**: Logarithmic colony forming units of (a) *S. aureus*, and (b) *P. aeruginosa* as a function of time for SBA-15, TiO2/SBA-15, and TiO2/MM-SBA-15.

**Table S2**: Ion concentrations in SBF solution.

| **Ion** | **Simulated Body Fluid / mM** | **Blood Plasma / mM** |
| --- | --- | --- |
| Na+ | 142 | 142 |
| K+ | 5 | 5 |
| Mg2+ | 1.5 | 1.5 |
| Ca2+ | 2.5 | 2.5 |
| Cl- | 148.8 | 103 |
| HCO3- | 4.2 | 27 |
| HPO42- | 1 | 1 |
| SO42- | 0.5 | 0.5 |
|  |  |  |
